# Supplementary material
Source: MDPI journal article supplement (https://www.mdpi.com/2075-4701/10/12/1616)
Supplement: s1 [file s1]

**Supplementary Materials:** The following are available online at [www.mdpi.com/xxx/s1](http://www.mdpi.com/xxx/s1), Figure S1:

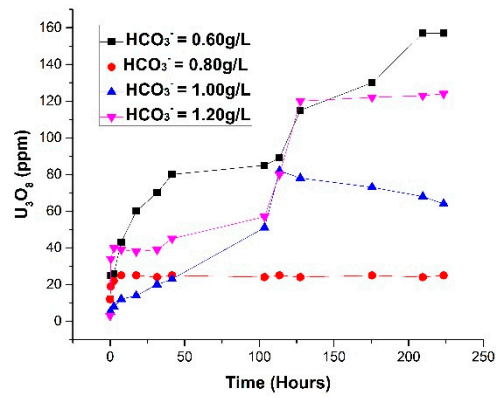

**Figure S1** Change in uranium concentration in the leaching solution.
